# Supplementary material for: Transformer-based deep learning method for optimizing ADMET properties of lead compounds
Source: Royal Society of Chemistry journal article supplement (doi:10.1039/d2cp05332b), 2023-01-01
Supplement: d2cp05332b1.pdf [file d2cp05332b1.pdf]

## Supporting Information

### Transformer-based deep learning method for optimizing ADMET properties of lead compounds

Lijuan Yang<sup>1,2,3,4</sup>, Chao Jin<sup>1</sup>, Guanghui Yang<sup>1,4</sup>, Zhitong Bing<sup>1,4</sup>, Liang Huang<sup>2</sup>, Yuzhen Niu<sup>5\*</sup> and  
Lei Yang<sup>1,4\*</sup>

1. Institute of modern physics, Chinese Academy of Science, Lanzhou 730000, China
2. School of Physics and Technology, Lanzhou University, Lanzhou 730000, China
3. School of Physics, University of Chinese Academy of Science, Beijing 100049, China
4. Advanced Energy Science and Technology Guangdong Laboratory, Huizhou 516000, China
5. Shandong Laboratory of Yantai Advanced Materials and Green, Yantai 264006, China

---

\* Corresponding to: Yuzhen Niu, Email address: niuyzh12@lzu.edu.cn

\* Corresponding to: Lei Yang, Email address: liyang\_imp@outlook.com

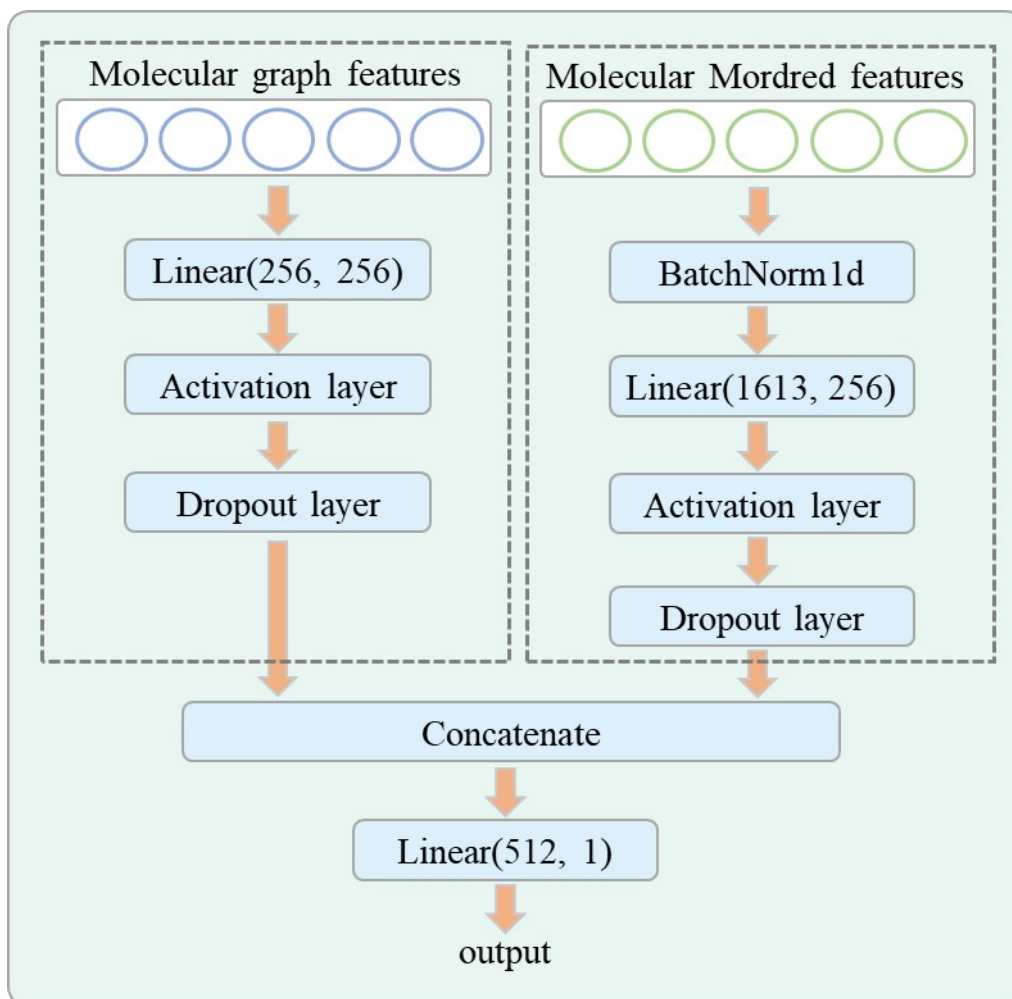

Figure S1. The detailed flow of the prediction layer.

Table S1. The hyperparameter settings for predictive and optimization models.

|            | ADMET prediction model           | Constraints-Transformer |
|------------|----------------------------------|-------------------------|
| Parameters | Optimizer=Adam                   | Optimizer=Adam          |
|            | Loss Function=BCE/ SmoothL1      | Loss Function=KLDivLoss |
|            | Lr=1e-5                          | Num_encoder_layer=6     |
|            | Num_encoder_layer=3              | Num_decoder_layer=6     |
|            | Num_heads=8                      | Num_heads=8             |
|            | D_model=256                      | D_model=256             |
|            | D_ff = 1024                      | D_ff = 2048             |
|            | Dense_dropout=0.5                | Epoch=100               |
|            | Dense_activation =LeakyRELU(0.1) | Batch_size=256          |
|            | Epoch=200                        | Num_samples=10          |
|            | Batch_size=24/32                 |                         |

Table S2. The label of each property.

| Property    | Measured unit                      | Threshold                          | Threshold in <i>ln</i> scale       | Discrete property labels    | Changed property labels      |
|-------------|------------------------------------|------------------------------------|------------------------------------|-----------------------------|------------------------------|
| <i>lnS</i>  | mol/L                              | Low: $\leq 0.05$<br>High: $> 0.05$ | Low: $\leq -3.0$<br>High: $> -3.0$ | $\ln S_{(\text{inf}, -7)}$  | $\ln S_{\text{low-high}}$    |
|             |                                    |                                    |                                    | $\ln S_{-7}$                | $\ln S_{\text{high-low}}$    |
|             |                                    |                                    |                                    | $\ln S_{-6}$                | $\ln S_{\text{no-change}}$   |
|             |                                    |                                    |                                    | ...                         |                              |
|             |                                    |                                    |                                    | $\ln S_{-2}$                |                              |
|             |                                    |                                    |                                    | $\ln S_{(2, \text{inf})}$   |                              |
| <i>logD</i> | --                                 | --                                 | --                                 | $\log D_{(\text{inf}, -5)}$ | $\log D_{(-\text{inf}, -5]}$ |
|             |                                    |                                    |                                    | $\log D_{-5}$               | $\log D_{(-5, -4]}$          |
|             |                                    |                                    |                                    | $\log D_{-4}$               | $\log D_{(-4, -3]}$          |
|             |                                    |                                    |                                    | ...                         | ...                          |
|             |                                    |                                    |                                    | $\log D_{-5}$               | $\log D_{(4, 5]}$            |
|             |                                    |                                    |                                    | $\log D_{(5, \text{inf})}$  | $\log D_{(5, \text{inf})}$   |
| <i>CL</i>   | $\mu\text{L}/\text{min}/\text{mg}$ | Low: $\leq 20$<br>High: $> 20$     | Low: $\leq 3.0$<br>High: $> 3.0$   | $CL_{(\text{inf}, -5)}$     | $CL_{\text{low-high}}$       |
|             |                                    |                                    |                                    | $CL_{-5}$                   | $CL_{\text{high-low}}$       |
|             |                                    |                                    |                                    | $CL_{-4}$                   | $CL_{\text{no-change}}$      |
|             |                                    |                                    |                                    | ...                         |                              |
|             |                                    |                                    |                                    | $CL_{-5}$                   |                              |
|             |                                    |                                    |                                    | $CL_{(5, \text{inf})}$      |                              |

Table S3. Evaluation result on TDC ADMET benchmark group.

| Dataset             | Matrix             | Current Top1       | Bert & Mordred     | Only Bert          | Only Mordred       | Rank        |
|---------------------|--------------------|--------------------|--------------------|--------------------|--------------------|-------------|
| caco2               | $MAE^{\downarrow}$ | 0.288±0.011        | <b>0.277±0.002</b> | 0.331±0.004        | 0.321±0.010        | 1st         |
| lipophilicity       |                    | 0.533±0.005        | <b>0.524±0.005</b> | 0.562±0.022        | 0.591±0.056        | 1st         |
| solubility_aqsolddb |                    | 0.727±0.004        | <b>0.727±0.004</b> | 0.771±0.009        | 0.780±0.024        | 1st         |
| ppbr                |                    | 8.251±0.115        | 7.879±0.102        | <b>7.722±0.165</b> | 10.889±0.269       | 1st         |
| ld50                |                    | 0.588±0.005        | <b>0.603±0.003</b> | 0.607±0.165        | 0.656±0.009        | 3rd         |
| hia                 | $AUROC^{\uparrow}$ | 0.988±0.002        | <b>0.979±0.008</b> | 0.936±0.021        | 0.933±0.020        | 3rd         |
| pgp                 |                    | 0.946±0.001        | <b>0.936±0.000</b> | 0.889±0.010        | 0.931±0.004        | 2nd         |
| bioav               |                    | 0.748±0.033        | 0.685±0.010        | 0.668±0.037        | <b>0.721±0.005</b> | 3rd         |
| bbb                 |                    | 0.905±0.001        | <b>0.911±0.002</b> | 0.868±0.007        | 0.899±0.004        | 1st         |
| cyp3a4 substrate    |                    | 0.680±0.005        | <b>0.681±0.000</b> | 0.652±0.008        | 0.669±0.012        | 1st         |
| herg                |                    | 0.874±0.014        | <b>0.835±0.014</b> | 0.789±0.017        | 0.801±0.013        | 3rd         |
| Ames                |                    | 0.865±0.002        | <b>0.855±0.001</b> | 0.804±0.006        | 0.844±0.002        | 3rd         |
| dili                |                    | 0.933±0.011        | <b>0.933±0.005</b> | 0.903±0.003        | 0.908±0.005        | 1st         |
| cyp2c9 inhibition   |                    | $AUPRC^{\uparrow}$ | 0.794±0.004        | <b>0.745±0.002</b> | 0.709±0.006        | 0.737±0.005 |
| cyp2d6 inhibition   | 0.721±0.001        |                    | <b>0.624±0.006</b> | 0.655±0.009        | 0.611±0.013        | 3rd         |
| cyp3a4 inhibition   | 0.882±0.001        |                    | 0.849±0.003        | 0.803±0.011        | <b>0.852±0.003</b> | 3rd         |
| cyp2c9 substrate    | 0.433±0.017        |                    | <b>0.444±0.014</b> | 0.396±0.015        | 0.416±0.022        | 1st         |
| cyp2d6 substrate    | 0.677±0.047        |                    | <b>0.725±0.012</b> | 0.579±0.006        | 0.678±0.030        | 1st         |
| Vdss                | $\rho^{\uparrow}$  | 0.612±0.018        | <b>0.632±0.015</b> | 0.585±0.014        | 0.583±0.026        | 1st         |
| Half life           |                    | 0.416±0.009        | <b>0.485±0.020</b> | 0.396±0.021        | <b>0.492±0.029</b> | 1st         |
| Cl-hepa             |                    | 0.491±0.006        | <b>0.422±0.011</b> | 0.364±0.031        | 0.405±0.008        | 3rd         |
| Cl-micro            |                    | 0.625±0.002        | <b>0.583±0.005</b> | 0.549±0.015        | 0.578±0.013        | 6th         |
